# Supplementary material for: Anticancer properties and metabolomic profiling of Shorea roxburghii extracts toward gastrointestinal cancer cell lines
Source: Springer Nature journal article supplement (doi:10.1186/s12906-024-04479-1), 2024-04-30
Supplement: MOESM1 [file 27043680]

Figure S1: Original images of blots shown in Figure 5C

Figure 5C

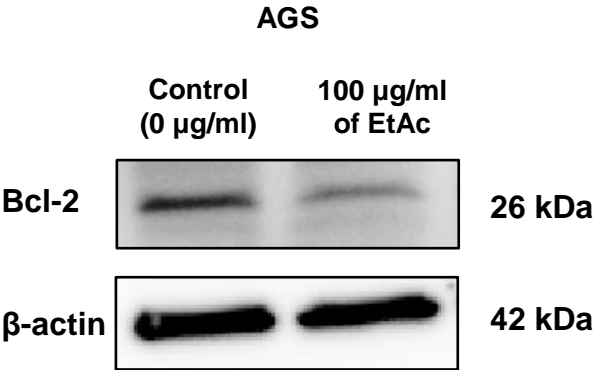

Bcl-2, #12789-1-AP Proteintech

β-actin, #A5441 Sigma-Aldrich

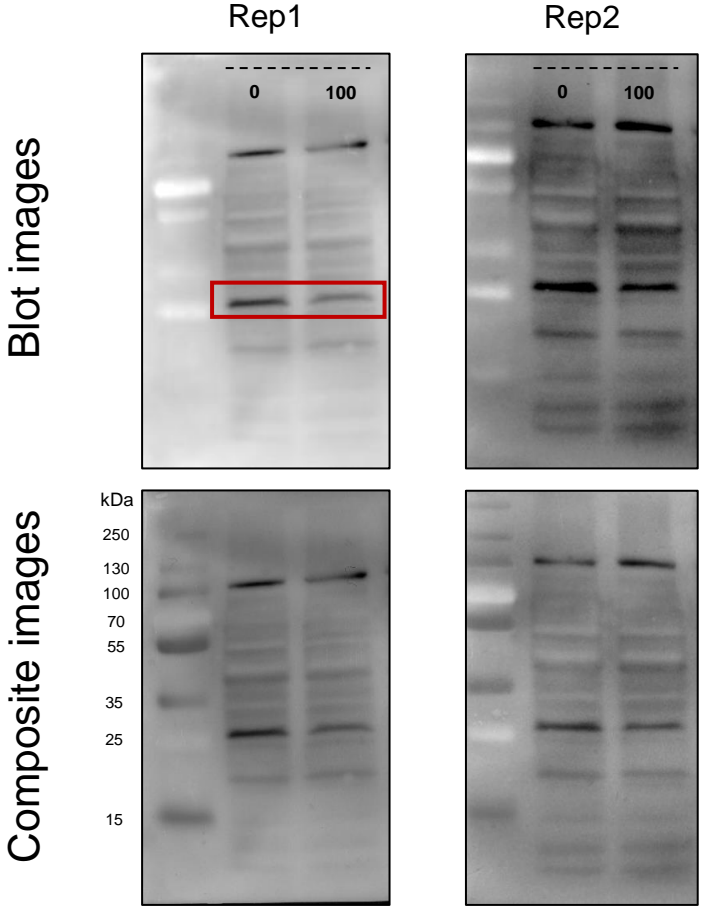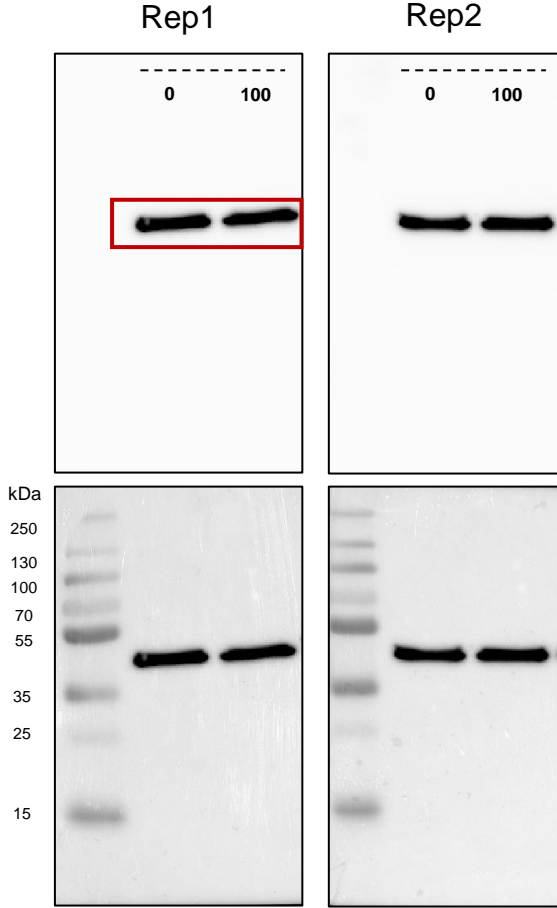

Boxed bands are shown in Figure 5C as representative.
